# Supplementary material
Source: PubMed Central journal article supplement (PMC3475147)
Supplement: Supp_Fig1.pdf [file Supp_Fig1.pdf]

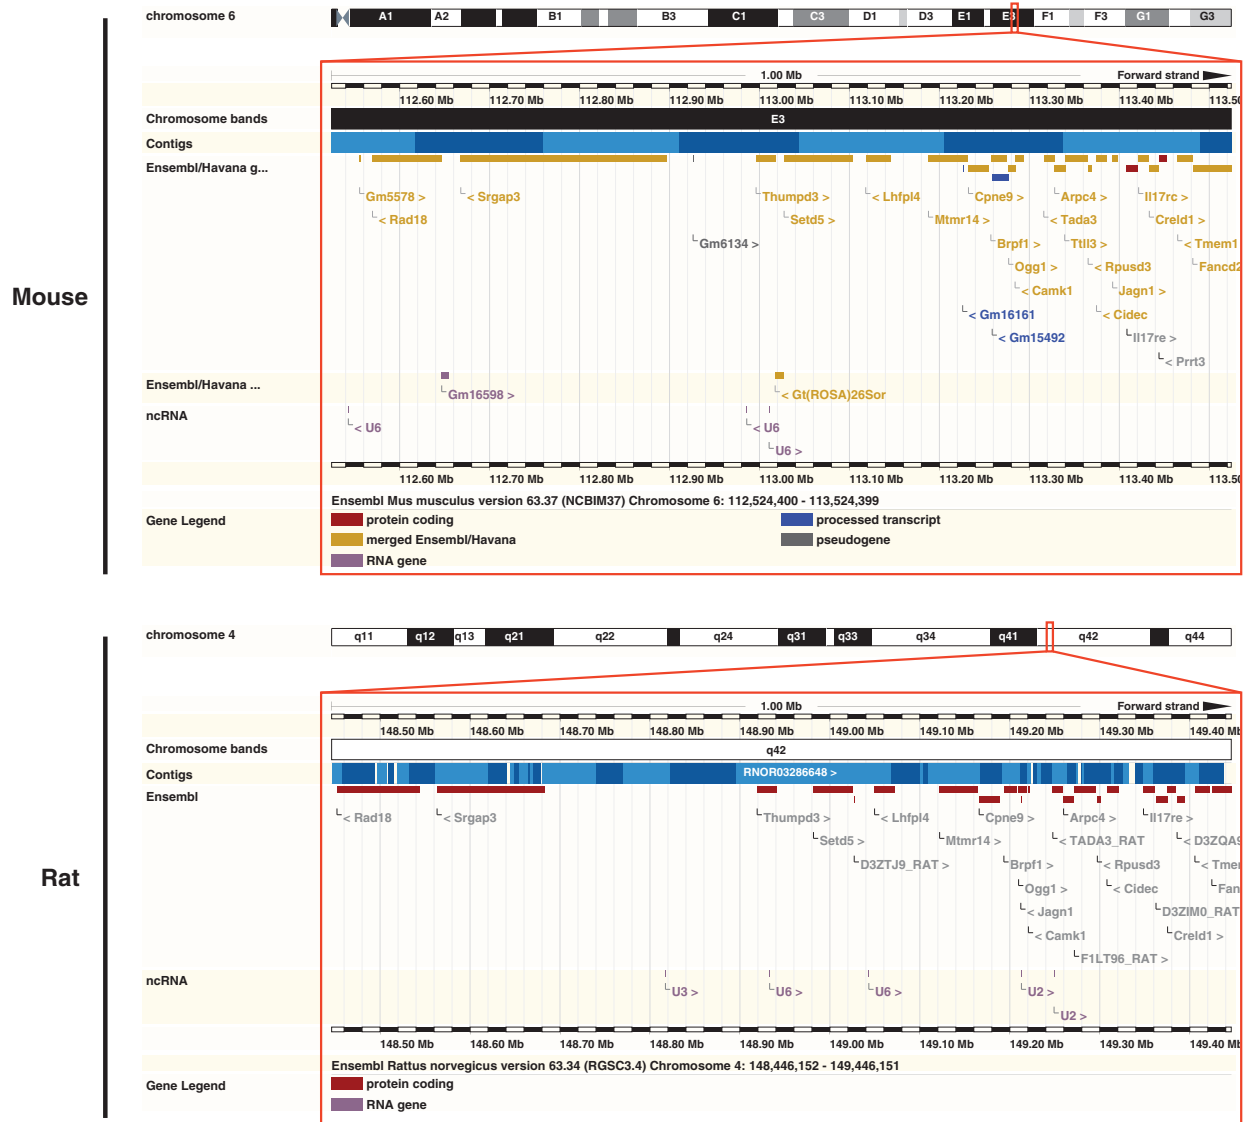

SUPPLEMENTARY FIG. S1. *Rosa26* loci and genes that are neighbors to *Rosa26* in mouse and rat genomes [modified from UCSC Genome Browser database (<http://genome.ucsc.edu/>)].
