# Supplementary material
Source: PubMed Central journal article supplement (PMC3475147)
Supplement: Supp_Fig2.pdf [file Supp_Fig2.pdf]

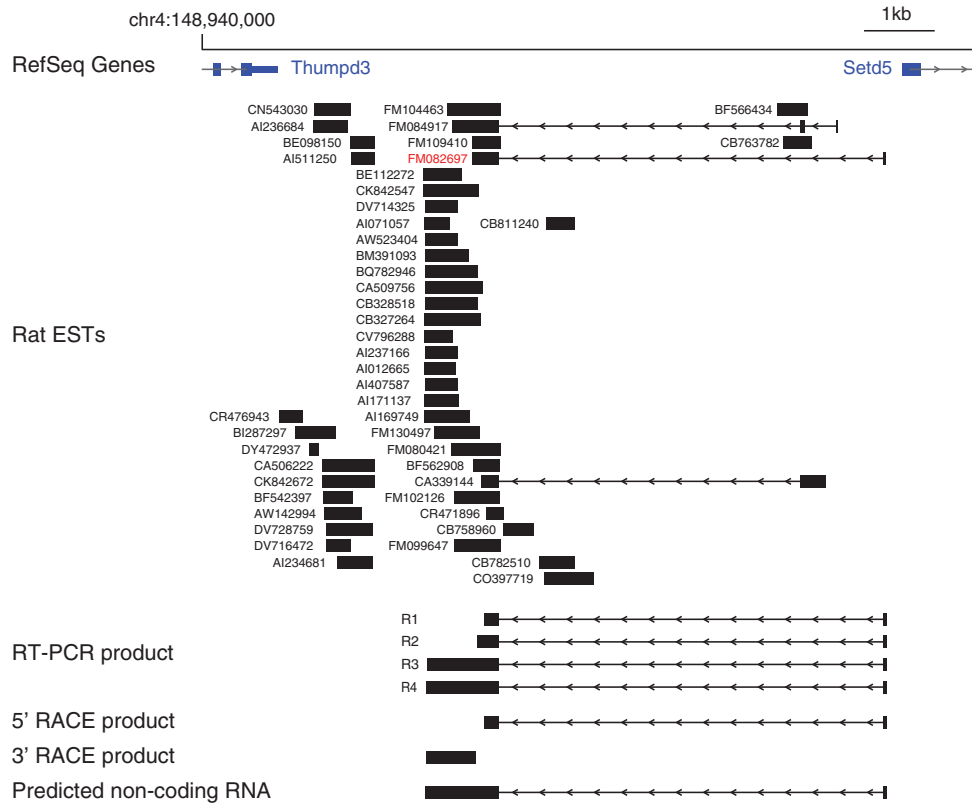

**SUPPLEMENTARY FIG. S2.** *Rosa26* Loci and ESTs from Database in rat genomes. EST, expressed sequence tag; RACE, rapid amplification of cDNA ends; RT-PCR, reverse transcription-polymerase chain reaction.
