# Supplementary material
Source: PubMed Central journal article supplement (PMC3475147)
Supplement: Supp_Fig3.pdf [file Supp_Fig3.pdf]

Query Range: 1 - 1113 (Rat predicted ncRNA)  
 Sbjct Range: 31 - 1124 (Mouse ncRNA-2: NR\_027009.1)  
 1146 bp, INT. Score: 656, OPT. Score: 2422  
 Identity: 854 / 1146 (74%)  
 Similarity: 854 / 1146 (74%)  
 Strand: Plus / Plus

|           |                                                               |     |            |                                                                |      |
|-----------|---------------------------------------------------------------|-----|------------|----------------------------------------------------------------|------|
| Query 1   | CTGTGCTCTGGGGCTCCGCTCCTCAGAGAGCCTCGGCTAGATTGTTCCCTGAGGACAGG   | 60  | Query 586  | GAGCAAAGAGTATTCTAAACCCTGAGCCATCTTTCCAGCTCCAACATACTAACTTCAGA    | 645  |
| Sbjct 31  | CTGTGCTTTGGGGCTCCGGCTCCTCAGAGAGCCTCGGCTAGATCATTCTTGAGGACAGG   | 90  | Sbjct 590  | ATGTATACTGTCTTTAGAGAGTTAATATAGCATGTCTTTTGCAACATACTAACTT-----   | 645  |
| Query 61  | ACAGTGCTTTGTTAAGAGCTATTCTGCTGTCTGAGCAGTAACAGGCTTCGAGATCAA     | 120 | Query 646  | TAGTGTGGAAACCATCAACTGTGTAGTCATTTTGAAGGGAGTCATCCAGTGAGTGCT      | 705  |
| Sbjct 91  | ACAGTGCTTTGTTAAGGCTATATTTCTGCTGTCTGAGCAGCAACAGGCTTCGAGATCAA   | 150 | Sbjct 646  | TTGTGTGGTGCAGCAATATTGTGTAGTCATTTGAAAGGAGTCATTTCAATGAGTGTC      | 705  |
| Query 121 | CATGATTTTCATAATCCCAAGATGTTGCCCTTTCCGTTCTCAGAAGCAAGCAGAGGCAGC  | 180 | Query 706  | GGATTATTTGAATGCTATGGAA-----GGA-ACATTTAAATGTTTCATAAAACA         | 754  |
| Sbjct 151 | CATGATGTTTCATAATCCCAAGATGTTGCCATTTATGTCTCAGAAGCAAGCAGAGGCATG  | 210 | Sbjct 706  | AGATTGTTTTGAATGTATTGAACATTTAAATGCAGACTTGTGCTGTTTTAGAAAGCA      | 765  |
| Query 181 | CTGAT-----ACTGCTCACTATGTTGAATGCTGCTGCGGTTGGATTTTTTTAA         | 230 | Query 755  | AAACTGTGAGAAGCTCAAAGTAGAAATAAAAAGCTGAAGTATTTGAGAAGGGAACAA      | 814  |
| Sbjct 211 | ATGGTCAGTGACAGTAATGTCACTGTGTTAAATGTTGCTATGCAAGTTGGATTTTTCTAA  | 270 | Sbjct 766  | AAACTGTGAGAAGCTTGAAGTAAATAAAAAGCTGAAGTATTTGAGAAGGGAATAA        | 825  |
| Query 231 | GGTAGTTTAGGTAGGAGGTATGTTTTGTATGAATAAACT-TAAGTTACACCTTCCA      | 289 | Query 815  | GCTACTTGCTGTATTAGTTAGAGAAATACATACTAGTAAAGAAATTTAAAAACCATATA    | 874  |
| Sbjct 271 | TGTAGTGTAGGTAGAACATATGTTCTGTATGAATAAACTCTAAGTTACACCTTGTA      | 330 | Sbjct 826  | GCTACTTGCTGTATTAGTTGAAGGAAAGTGAATAGCTTAGAAAAATTT-AAAAACCATATA  | 884  |
| Query 290 | TAATTCATGC--AGTGTGTCACATTTGCCATTTTTAAGTCTTGCAAGTTTTTTCGTACAT  | 347 | Query 875  | CTTGACATTGCTGAGTATCTGCCAGATGAAAAGGAATGCTCAGAGTGGTCTGTTGAGCA    | 934  |
| Sbjct 331 | TAATCCATGCAATGTTATGCAATTACCA-TTTTAAGTATTGTAGCTTTCTTTGTATGT    | 389 | Sbjct 885  | GTTGTCACTGCTGAATATCTGGCAGATGAAAAGAAATCTC--AGTGGTCTTTTGTAGCA    | 942  |
| Query 348 | GAGGATAAAGGTGCTTTAGAGTGCATAAATAACGTTGCTTTTGGCAACATACATATTATTC | 407 | Query 935  | ATATAACAACCTGTTATATTAAGACTTT-CCCACAGATTTAACTGTAATCTGTAATTC     | 993  |
| Sbjct 390 | GAGGATAAAGGTG--TTG--TCATAAA-----ATGTTTTG-AACAT--TTCCCC        | 432 | Sbjct 943  | ATATAACAGCTGTTATATTAATAAATTTCCCCACAGATATAAAGCTGTAATCTATAACTC   | 1002 |
| Query 408 | ATTTATCATATATTTATTTTACGCATATGAGAGTTTTGTCTGCATACATGTTGTGAG     | 467 | Query 994  | ATGTATGTATGTTACAAATGGATGAAACTTA-AAACGTTGGCTGGTCTTGTCACTGTGTT   | 1052 |
| Sbjct 433 | AAAGTCCAAATTATAAAACCACAAGCTTAGA-ACTTATTTATGAACA-ATGGTGT-AG    | 489 | Sbjct 1003 | -----ATAATGTTACAAATGGATGAAAGCTTACAAATGTGGCTTGACTTGCTCACTGTGCTT | 1058 |
| Query 468 | CTATATGCATGCCTAGTGCCTGGTGAAGTACAGAGAGGGTGGTGGTCCCTTGAAACTGT   | 527 | Query 1053 | G---TATTTATGTGAAAGCTTGGCAATAAAGCTTATG---CAAAAAAAAAAAAAAAAAAAA  | 1107 |
| Sbjct 490 | TTTCATGCTTTTAAATGCTTAATTA-TTCA-----ATTAACACCGTT-----TGT       | 534 | Sbjct 1059 | GTTTTAGTTATGTGAAAGTTGGCAATAAACCTATGCTCTAAATAGTCAAAAAAAAAAAAA   | 1118 |
| Query 528 | AGTTACAGGGTGT-GACCCACCATGTGGCTGAAGTGAATTGAACCCAGC-TTCTACAA    | 585 | Query 1108 | AAAAAA 1113                                                    |      |
| Sbjct 535 | -GTTATAATATATAAAACTGCATGTAG--AAGTG-TTTGTCAGAACATTTCTTAA       | 589 | Sbjct 1119 | AAAAAA 1124                                                    |      |

SUPPLEMENTARY FIG. S3. Homology of rat and mouse *Rosa26* noncoding RNAs.
